# Supplementary material
Source: Springer Nature journal article supplement (https://www.springermedizin.de/resource/supplementary/12916_2011_526_MOESM1_ESM.pdf/9598096)
Supplement: MOESM1 [file 9598096]

## Literature search:

Mainstream databases (e.g. MEDLINE, EMBASE) and other databases

Search results  
combined  
(n=154)

*Articles screened on  
basis of title and  
abstract*

Included  
(n=37)

### Excluded (n=117)

Devoid of relevant maternal or infant outcomes  
No control group  
No lifestyle, dietary, health education or  
exercise intervention  
GDM, Pre-pregnancy diabetes or PCOS

*Full text  
manuscript review  
and application of  
inclusion criteria*

### Excluded (n=18)

Trial protocol (2)  
Data not complete (4)  
Duplicate publication data (2)  
Observational study (1)  
Outcome data not relevant (8)  
Pilot RCT with small sample size (1)

RCTs  
(n=13)

Non-RCTs  
(n=6)
